# Supplementary material for: Ultrafast Triggering of Strong Coupling in a Semiconductor Terahertz Fabry Perot Cavity
Source: Research Square preprint supplement (doi:10.21203/rs.3.rs-7293989/v1), 2025-10-31
Supplement: Supplementary file 1 [file e99082539b37b72e4daa0d11.docx]

**Supplementary Information**

Ultrafast Triggering of Strong Coupling in a Semiconductor Terahertz Fabry Perot Cavity

Soumitra Hazra1,2, Hanna Turchinsky1,2, Tal Schwartz1,2, and Sharly Fleischer1,2

1Raymond and Beverly Sackler Faculty of Exact Sciences, School of Chemistry, Tel Aviv University, Tel Aviv 6997801, Israel

2Tel Aviv University Center for Light-Matter Interaction, Tel Aviv 6997801, Israel

Email: soumitra.hazra89@gmail.com, sharlyf@tauex.tau.ac.il

**Sections S1: Calculation of THz complex refractive index of the silicon wafer**

For extracting the complex refractive index of the Si wafer in the THz frequency range, we have measured the THz transmission through the silicon wafer () and through air () as reference. The ratio of the Fourier transform of the THz field provides the experimental complex transmission i.e. . The theoretical transfer function of the Si wafer includes the Fresnel reflection and transmission coefficient of the Si-air interface given by , , where and are the complex refractive index of the respective media. Additionally, the propagation of the field through the Si wafer is described by , where is the thickness of the Si wafer and is the free space wavevector. The Fabry-Perot reflection term inside the Si wafer is given by, . These components, as illustrated in Fig. S1a, altogether define the theoretical transfer function () with air as the reference, which is presented in Eq. 1 in the main text.

Figure S1: (a) Sample and reference settings for building the theoretical transfer function for Si wafer. (b) and (c) show the extracted refractive index coefficients (real part in black, imaginary part in red) of unexcited and PE (energy 150) Si wafer respectively.

The thickness of the thin silicon wafer was mechanically measured as *d = 12µm,* using a micrometer screw gauge. Numerical minimization of the difference between the experimental and theoretical transfer function () yields the complex refractive index . For the optimization, we have used total variation technique based on the Nelder-Mead algorithm  [1]. The extracted frequency-dependent refractive indices using our home-built code were found identical to those extracted using Nelly, an open-source package for extracting the complex THz refractive index  [2].

**Section S2: Reflectivity of Si wafer**

The power reflectivity () of the Si wafer was calculated as  [3]:

(s1)

We note the importance of accounting for multiple internal reflections and interference effects within the thin, subwavelength Si wafer.

Here, and are the complex Fresnel reflection coefficient at the air-Si and Si-air interfaces respectively. The phase delay due to round-trip propagation within the Si layer is given by , where is the complex refractive index of Si and is the THz wavelength(s) in vacuum (air). The calculated power reflectivity of the unexcited and PE Si at various PE energies is shown in Fig. 2c.

**Section S3: Phase of reflection at the interface of the cavity**

We calculated the frequency-dependent complex reflection coefficient () at the air-Si () and Si-air () interfaces using the complex refractive index of the Si wafer, as shown in Fig.2b. The phase of the reflection coefficient defined as is approximately and for both unexcited and PE Si, as illustrated in Fig.S3.

Figure S3 The reflection at the air-Si and Si-air interfaces for PE energies spanning the range of photoexcitation energies used in this work.

**Section S4: PE-Induced Redshift at small cavity length**

As the main reason for the redshift is attributed to the phase-shift at the air-Si interface, the effect of the latter on the detuning magnitude is larger at small cavity length. This is exemplified here for a switchable Si cavity with (~4 times smaller than the cavity length used in Fig.3 of the main text). Here the unexcited m=1 cavity frequency is and upon PE a large redshift is observed, down to .

Figure S4. (a) The transmission of the empty cavity for cavity length where, the (unexcited) cavity frequency is . The cavity modes are redshifted with increasing the PE energy. (b) Frequency redshift of the m = 1 cavity mode at varying PE energies.

**Section S5: Complex permittivity of α-Lactose crystal**

Using the complex refractive index () as shown in Fig.4b, the complex permittivity was extracted using the relations: and . The complex permitivity was fitted with the Drude-Lorentz model with one vibrational transition  [4]:

(s2)

Where = 3.2 is the background dielectric constant, is the vibrational mode, is the linewidth and THz is the plasma frequency. The complex permittivity of the α-lactose with the Drude-Lorentz fit is shown in Fig S5.

Fig. S5. The complex permitivity of the α-lactose pellet of thickness 270µm. The solid line is the Drude-Lorentz model fit (Eq. s2).

**Section S6: Thermal effect of photoexcitation on cavity transmission**

Since long-time irradiation of the Si wafers by the 800nm PE pulse train at the repetition rate of our laser (1KHz) may lead to accumulation of heat and elevated temperature, we compared the transmission of the unexcited cavity to that of an excited cavity. Here the PE pulse arrives at a delay of 60ps past the THz probe ( past recombination), yet affected by the (possibly) accumulated temperatures. As redily observed, the unexcited and the PE transmission spectra are in very good agreement, reassuring that thermally-induced changes in the optical parameters of the Si are negligibly small.

Fig. S6. The power transmission spectrum of the Si FP cavity with 108µm αLM pellet inside for unexcited and PE at pump energy 150µJ, pump delay Δt=-60ps.

**References**

[1] I. Pupeza, R. Wilk, and M. Koch, *Highly Accurate Optical Material Parameter Determination with THz Time-Domain Spectroscopy*, Opt. Express, Vol. 15, Issue 7, Pp. 4335-4350 **15**, 4335 (2007).

[2] U. Tayvah, J. A. Spies, J. Neu, and C. A. Schmuttenmaer, *Nelly: A User-Friendly and Open-Source Implementation of Tree-Based Complex Refractive Index Analysis for Terahertz Spectroscopy*, Anal. Chem. **93**, 11243 (2021).

[3] Pochi Yeh, *Optical Waves in Layered Media* (Wiley-Interscience, 2005).

[4] A. Roggenbuck, H. Schmitz, A. Deninger, I. C. Mayorga, J. Hemberger, R. Güsten, and M. Grüninger, *Coherent Broadband Continuous-Wave Terahertz Spectroscopy on Solid-State Samples*, New J. Phys. **12**, 043017 (2010).
